# Supplementary material
Source: publisher figshare collection journal article supplement (https://brill.figshare.com/articles/dataset/_/11902071)
Supplement: Supplementary file 1 [file 1]

Developmental costs of yellow colouration in fire salamanders  
and experiments to test the efficiency of yellow as a warning  
colouration

Barbara A. Caspers<sup>1,\*</sup>, E. Tobias Krause<sup>2</sup>, Isabelle Hermanski<sup>1</sup>, Christopher  
Wiesbrock<sup>1</sup>, Friedrich-Wilhelm Kastrup<sup>3</sup>, Sebastian Steinfartz<sup>4</sup>

1 - Department of Behavioural Ecology, Bielefeld University, 33615 Bielefeld, Germany

2 - Friedrich-Loeffler Institut, Institute of Animal Welfare and Husbandry, Doernbergstr. 25-27, 29223  
Celle, Germany

3 - Department of Engineering and Mathematics, University of Applied Sciences, Interaktion 1, 33619  
Bielefeld, Germany

4 - University of Leipzig, Institute for Biology, Molekulare Evolution und Systematik der Tiere,  
Leipzig, Germany

\*Corresponding author; email: [barbara.caspers@uni-bielefeld.de](mailto:barbara.caspers@uni-bielefeld.de)

**Supplementary material**

**Figure S1.** Pictures of fire salamander siblings reared under two different nutritional treatments during the larval stage. Pictures were taken 50 days after metamorphosis.

|      | Good nutritional conditions                                                         | Limited nutritional conditions                                                       |
|------|-------------------------------------------------------------------------------------|--------------------------------------------------------------------------------------|
| F_27 |    |    |
| F_42 |   |   |
| F_43 |  |  |
| F_48 |  |  |

|      |                                                                                     |                                                                                      |
|------|-------------------------------------------------------------------------------------|--------------------------------------------------------------------------------------|
| F_52 |    |    |
| F_55 |    |    |
| F_58 |   |   |
| F_60 |  |  |
| F_67 |  |  |
|      |                                                                                     |                                                                                      |
